# Supplementary material
Source: Springer Nature journal article supplement (https://www.springermedizin.de/resource/supplementary/12894_2006_93_MOESM11_ESM.pdf/9513944)

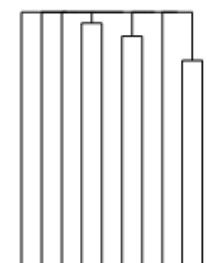

IF-1/V\$HFX\_Q6  
 Mx2-5/V\$HFX25\_02  
 RFx1/V\$RFx1\_02  
 Mx2-5/V\$HFX25\_01  
 E2F/V\$E2F\_02  
 HIF-1/V\$HIF1\_C  
 HFH-1/V\$HFH1\_01  
 CREB/V\$CREB\_Q2  
 XFD-1/V\$XFD1\_01  
 AP-1/V\$AP1\_C

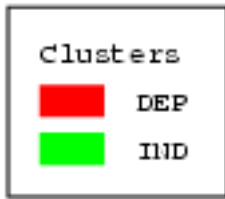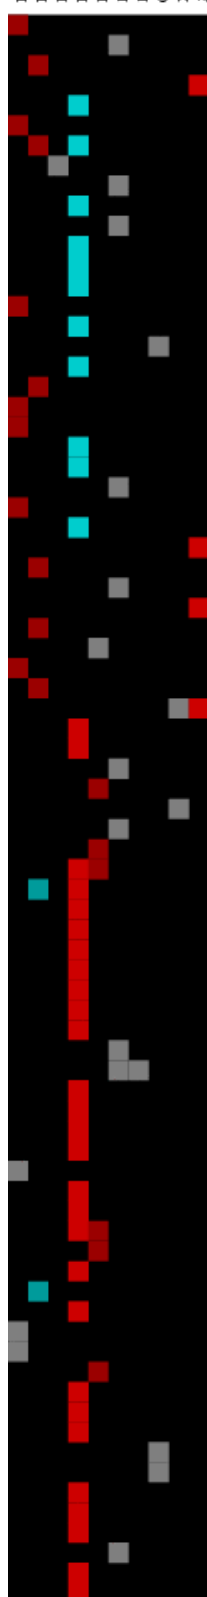

AF020198  
 AJ001549  
 D14340  
 D31788  
 J03958  
 J05186  
 L21027  
 L40406  
 M14757  
 M20658  
 M28233  
 M35523  
 M60909  
 M81342  
 U19597  
 U21050  
 U31625  
 U36203  
 U37522  
 U53228  
 U60530  
 U73521  
 U75506  
 U89487  
 U92456  
 X53584  
 X53584  
 X56182  
 X57796  
 X59421  
 X61753  
 X81581  
 X83106  
 X87257  
 Y00671  
 AF002823  
 AF042822  
 AJ001700  
 AJ002636  
 D13801  
 D13867  
 D30743  
 D64107  
 J00380  
 J04113  
 L07918  
 L10075  
 M11434  
 M11434  
 M11434  
 M32502  
 M63802  
 M83184  
 M83312  
 M88127  
 M95106  
 U28068  
 U28423  
 U30823  
 U43788  
 U46684  
 U46923  
 U59876  
 U61110  
 U61112  
 U78103  
 U86016  
 U88327  
 U92972  
 U94349  
 X06203  
 X14897  
 X15842  
 X53532  
 X54924  
 X58384  
 X70472  
 X85994  
 X97817

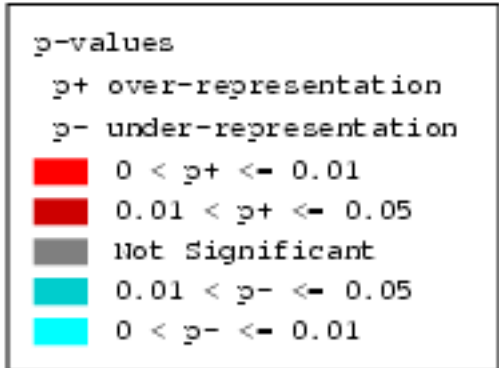

Supplement: MOESM11 [file 9513944]
